# Supplementary material for: Characterization of tumor-associated T-lymphocyte subsets and immune checkpoint molecules in head and neck squamous cell carcinoma
Source: PubMed Central journal article supplement (PMC5546490; doi:10.18632/oncotarget.17901), 2017-05-16
Supplement: oncotarget-08-44418-s001.pdf [file oncotarget-08-44418-s001.pdf]

## Characterization of tumor-associated T-lymphocyte subsets and immune checkpoint molecules in head and neck squamous cell carcinoma

### Supplementary Materials

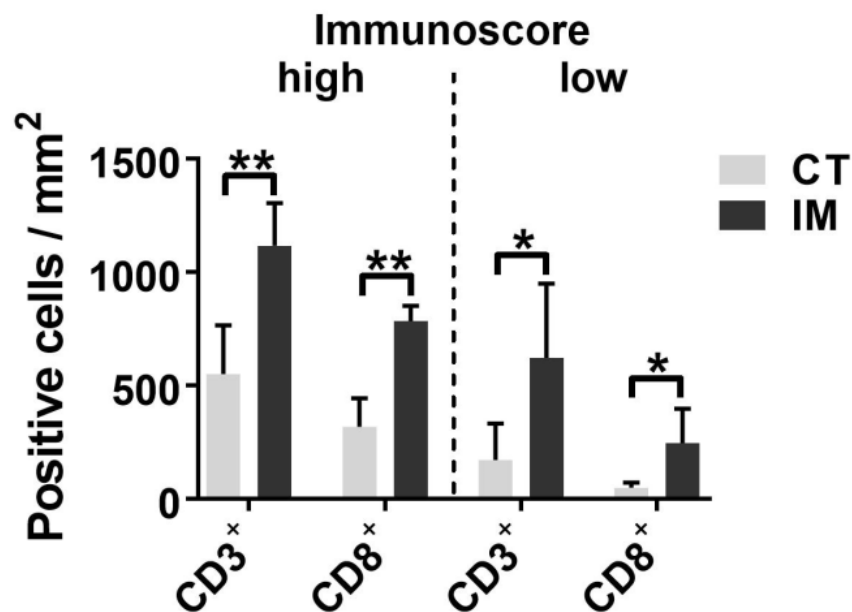

**Supplementary Figure 1: CD3<sup>+</sup> and CD8<sup>+</sup> cell densities in 'Immunoscore high/low' HNSCC.** Results of automated analysis of CD3 and CD8 immunohistochemistry are summarized. CD3<sup>+</sup> and CD8<sup>+</sup> cell numbers per mm<sup>2</sup> in tumor core (CT) and invasive margin (IM) of tumors classified as 'Immunoscore high' and 'Immunoscore low' are shown in bar graphs (mean value and standard deviation). For statistical analysis, t tests were performed. Data is depicted as mean ± standard deviation. \**P* < 0.05; \*\**P* < 0.005.
